# Supplementary material for: SALL1 functions as a tumor suppressor in breast cancer by regulating cancer cell senescence and metastasis through the NuRD complex
Source: Springer Nature journal article supplement (doi:10.1186/s12943-018-0824-y), 2018-04-06

Figure 1. Ma et al.

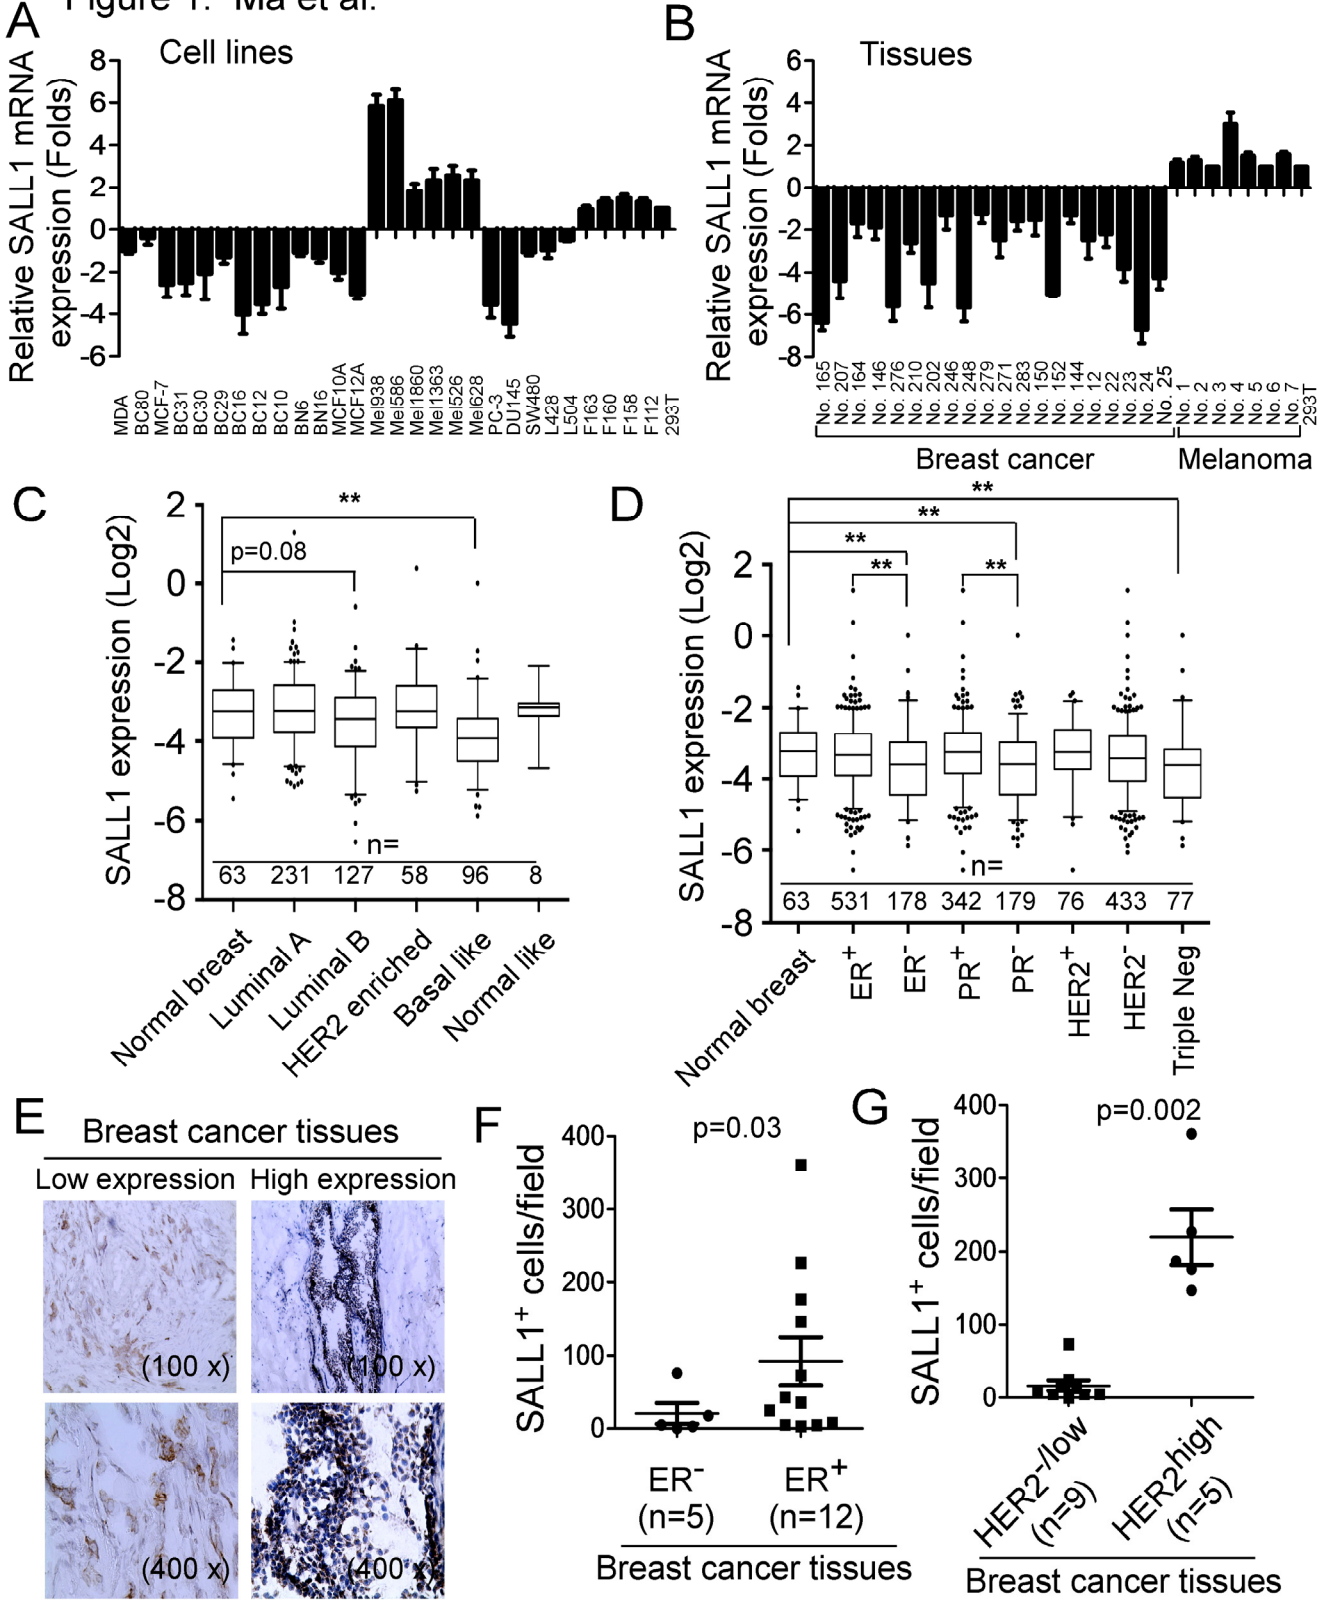

Figure 2. Ma et al.

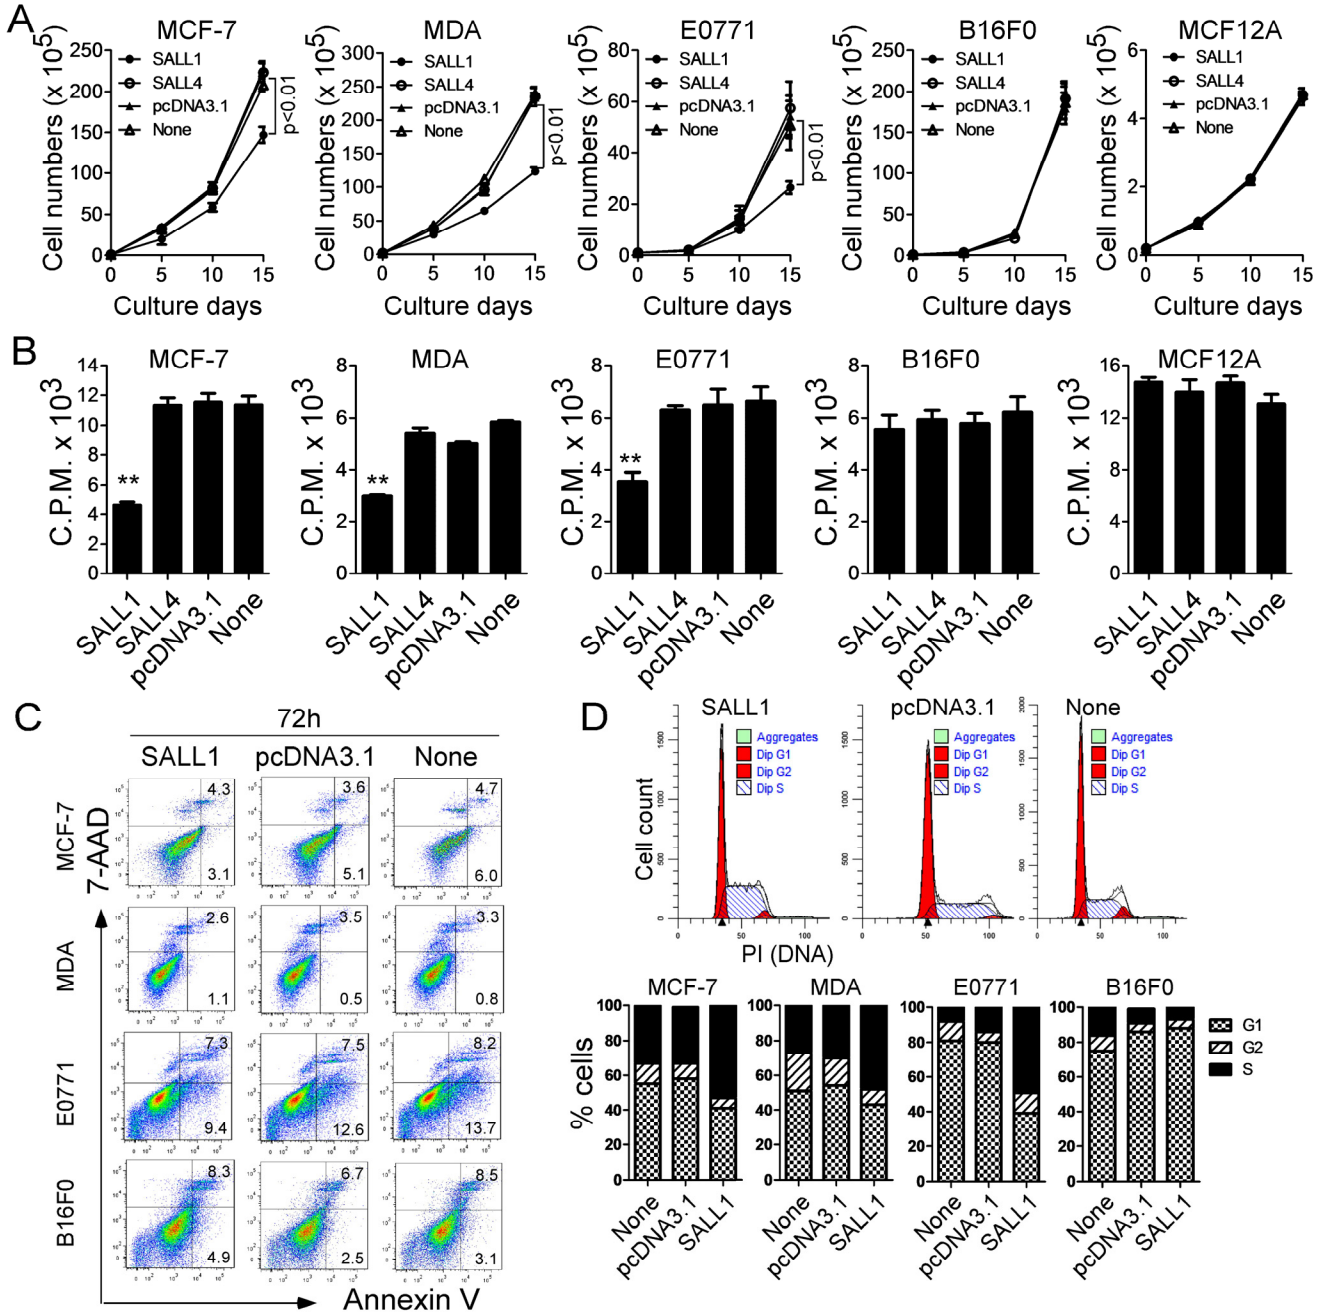

Figure 3. Ma et al.

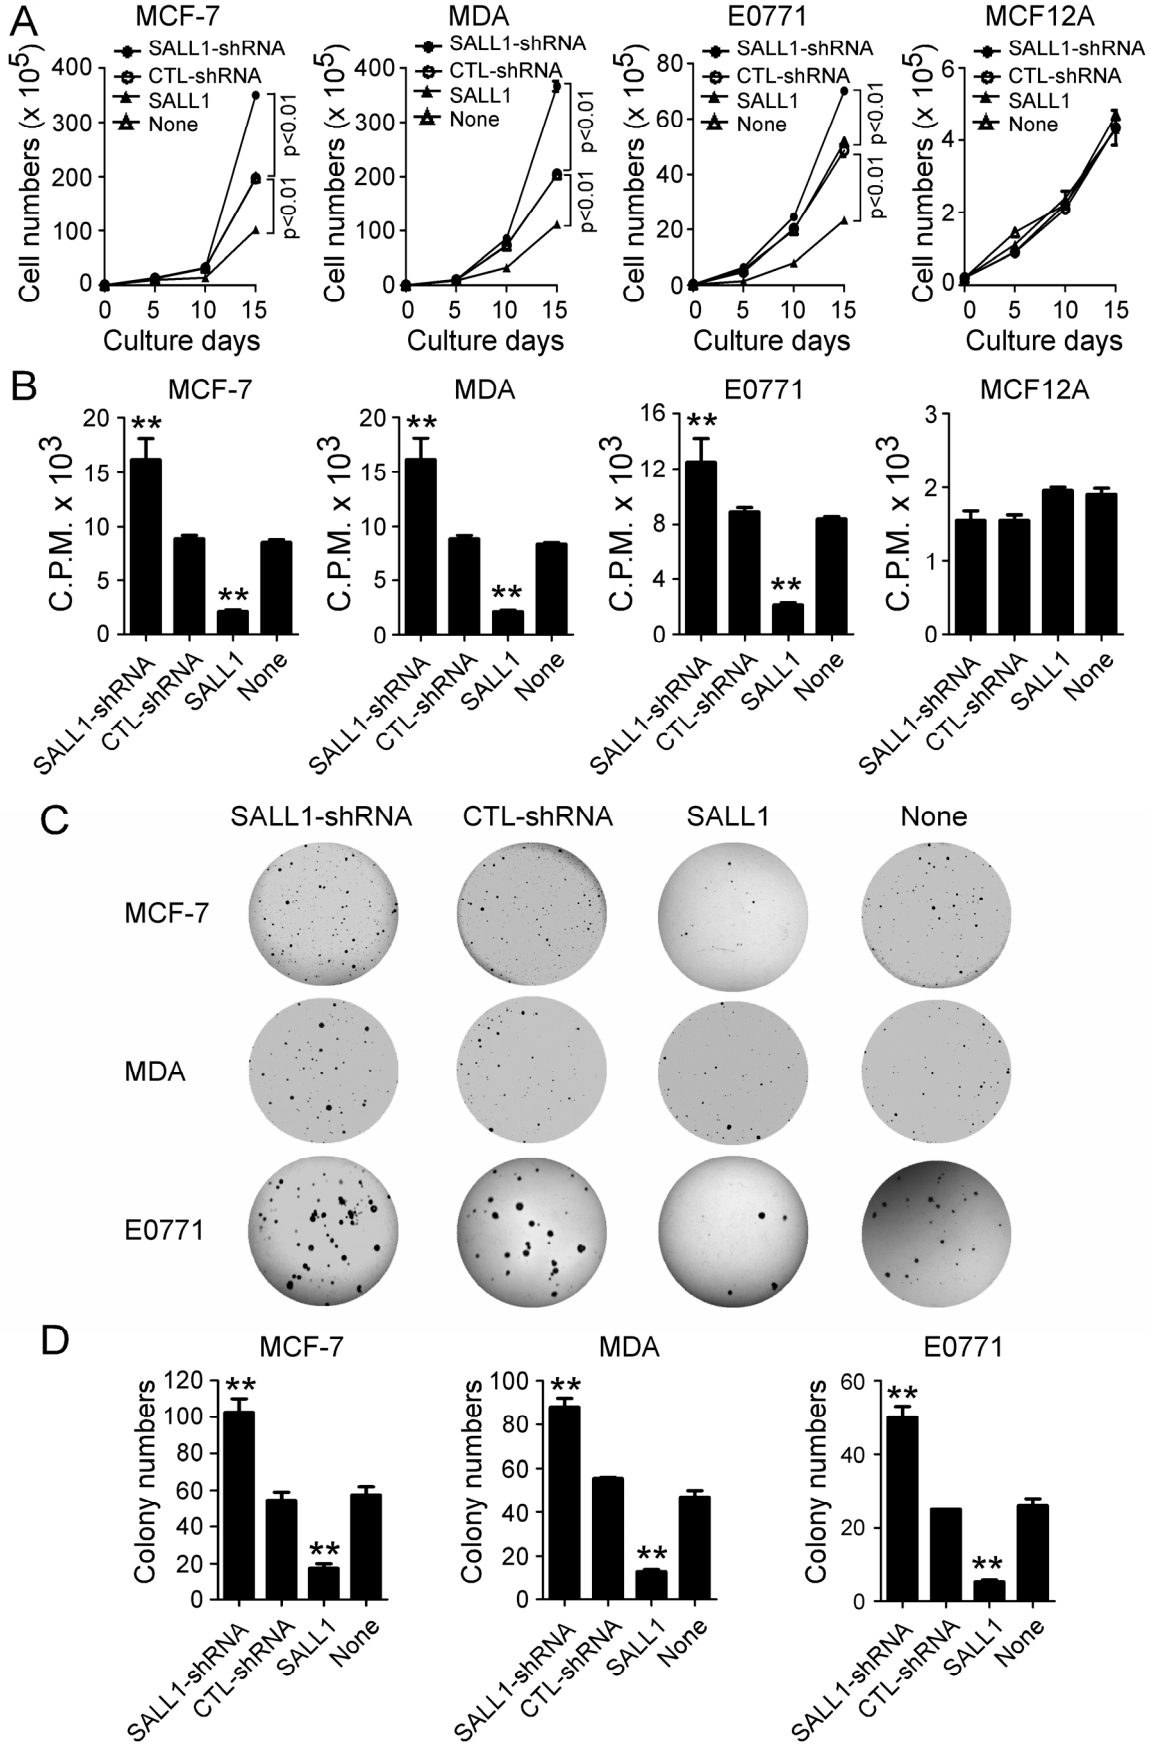

Figure 4. Ma et al.

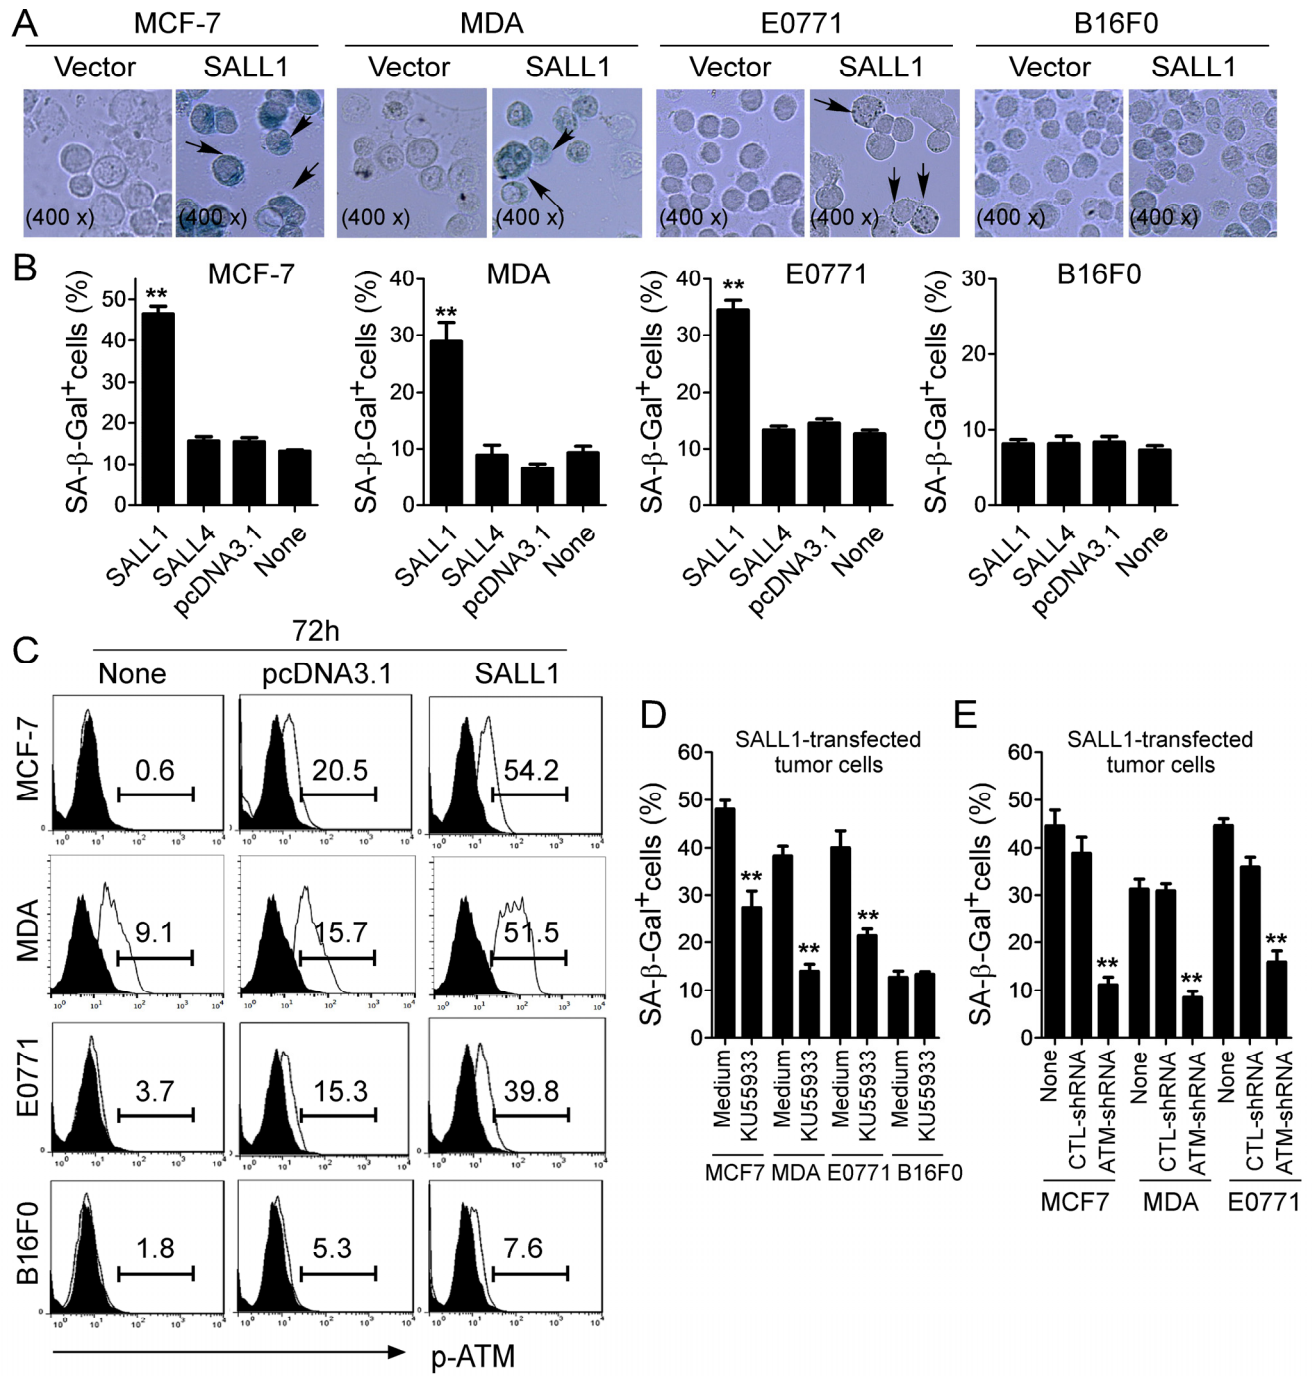

Figure 5. Ma et al.

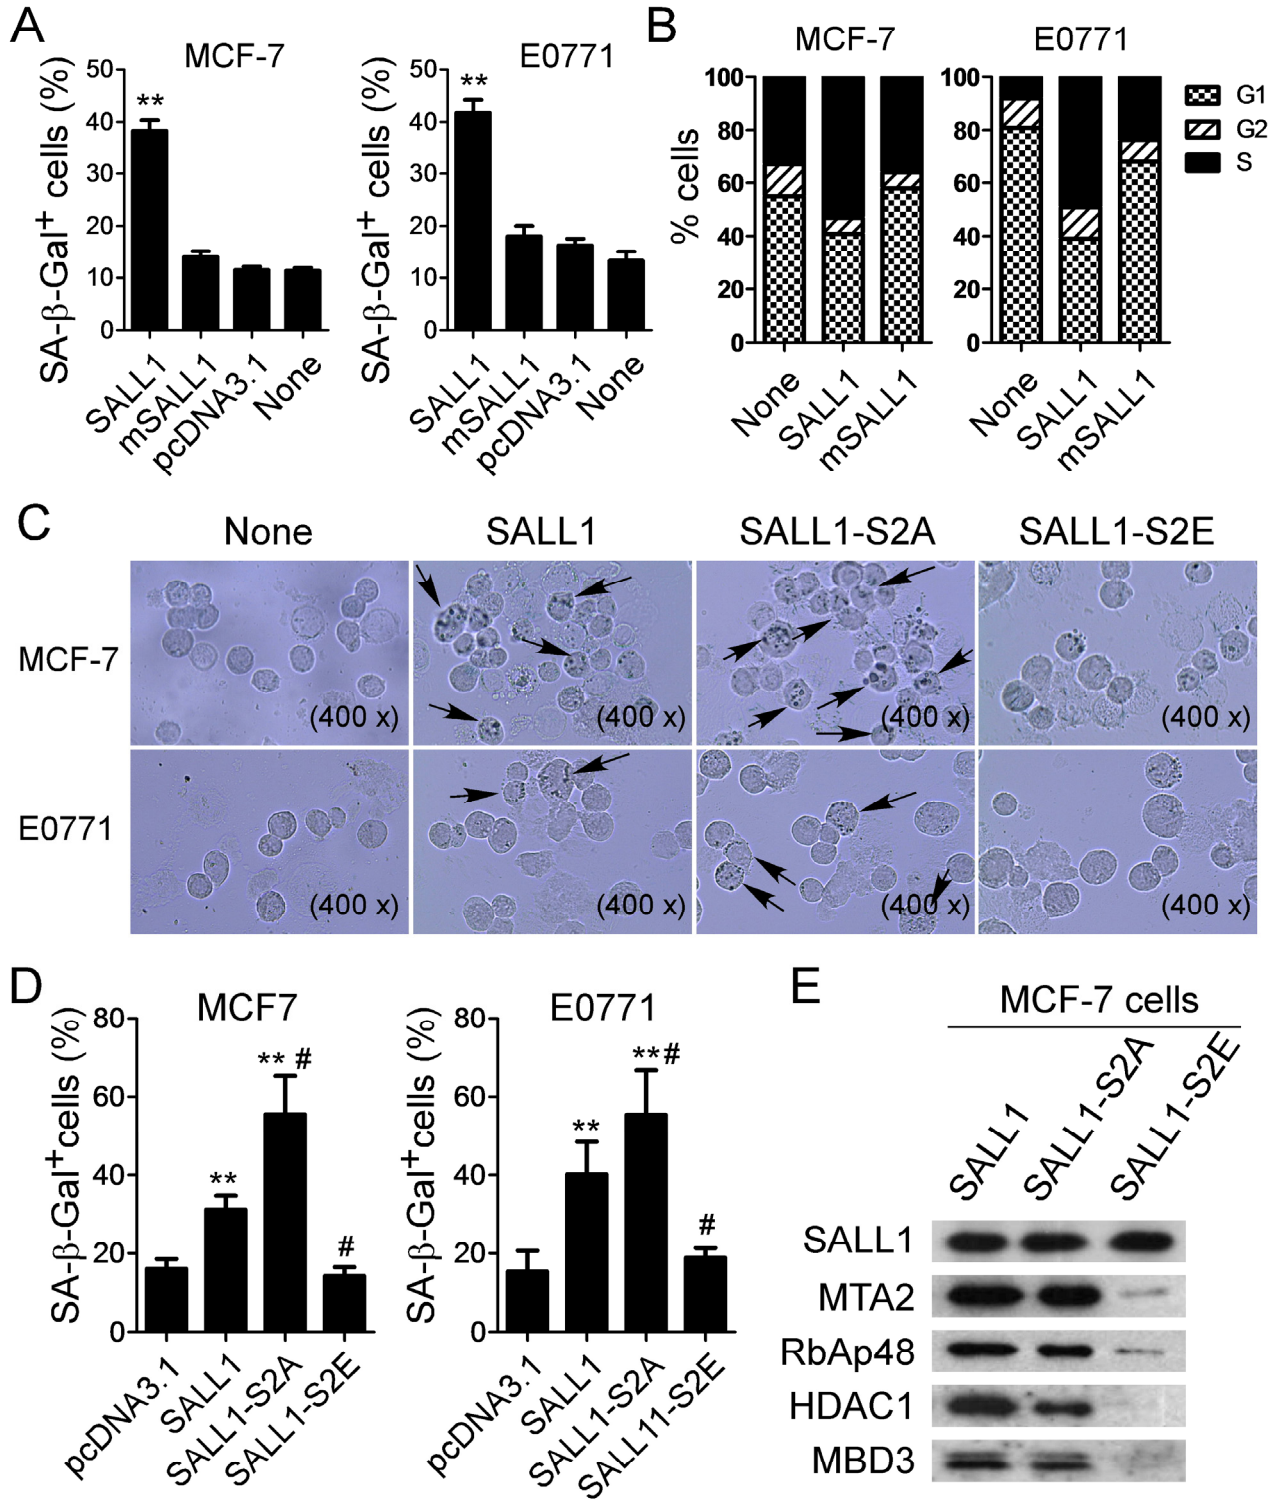

Figure 6. Ma et al.

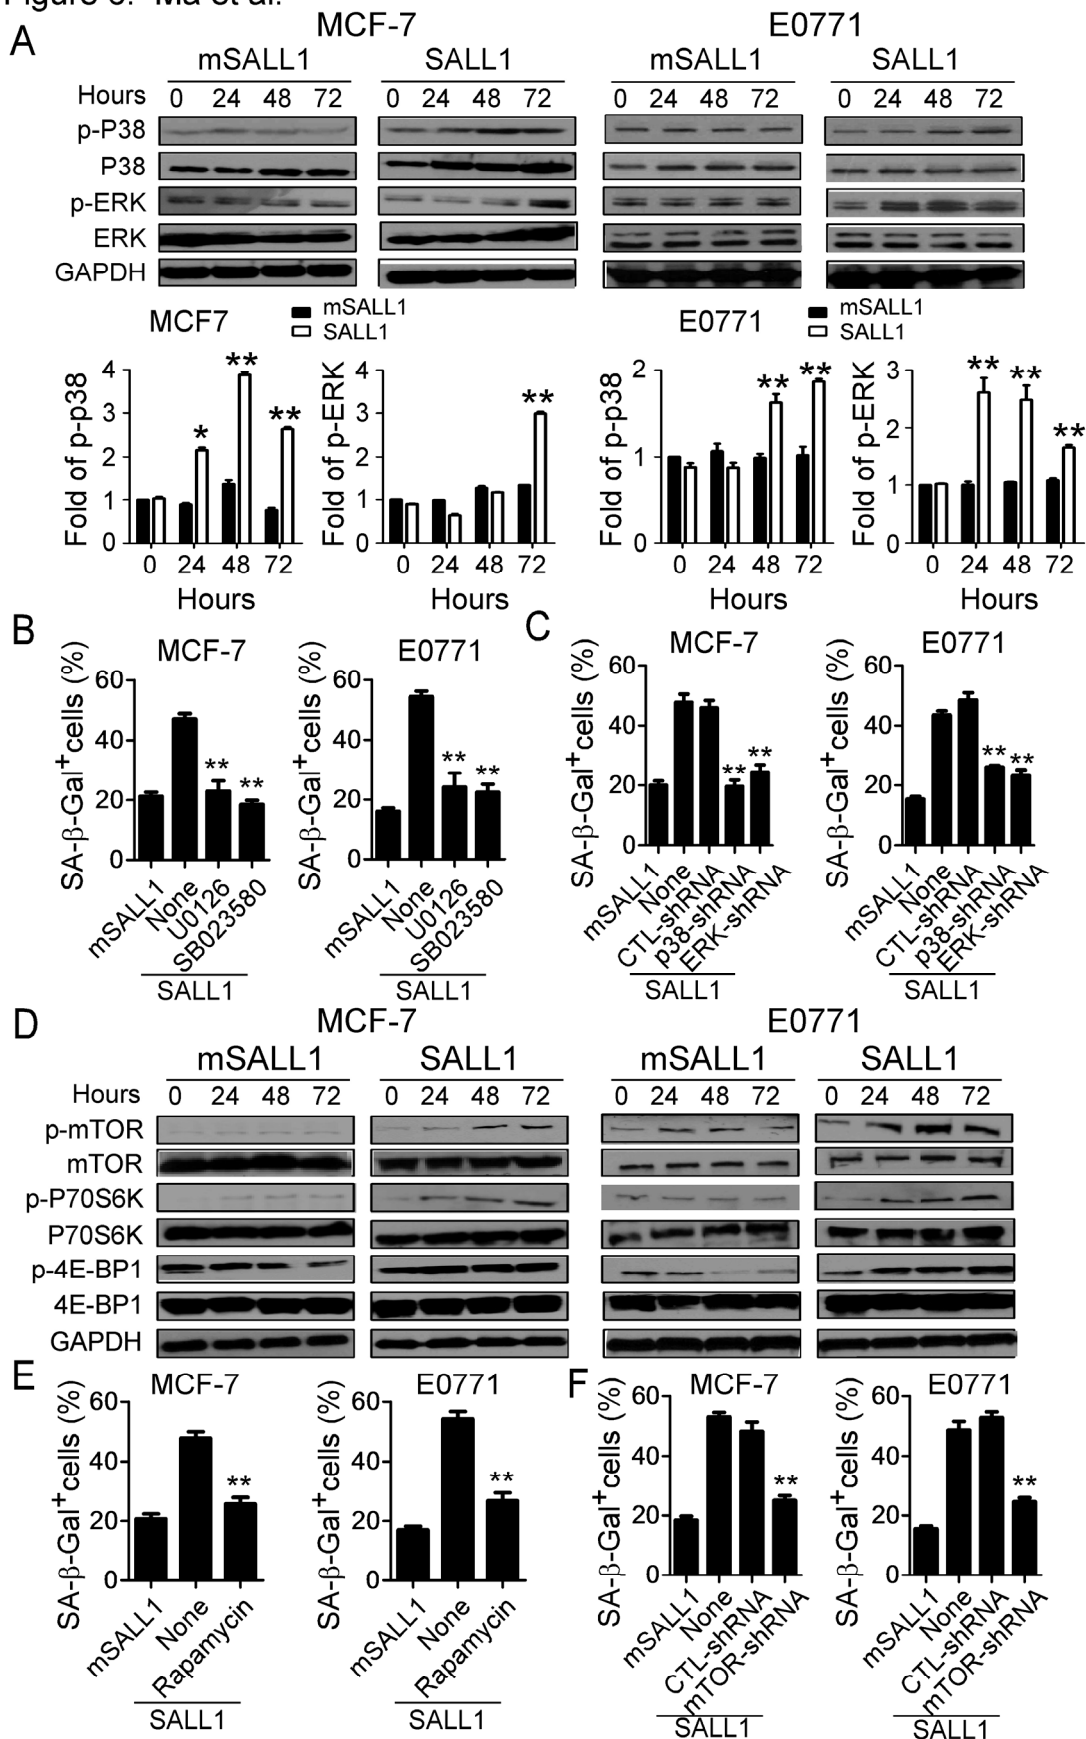

Figure 7. Ma et al.

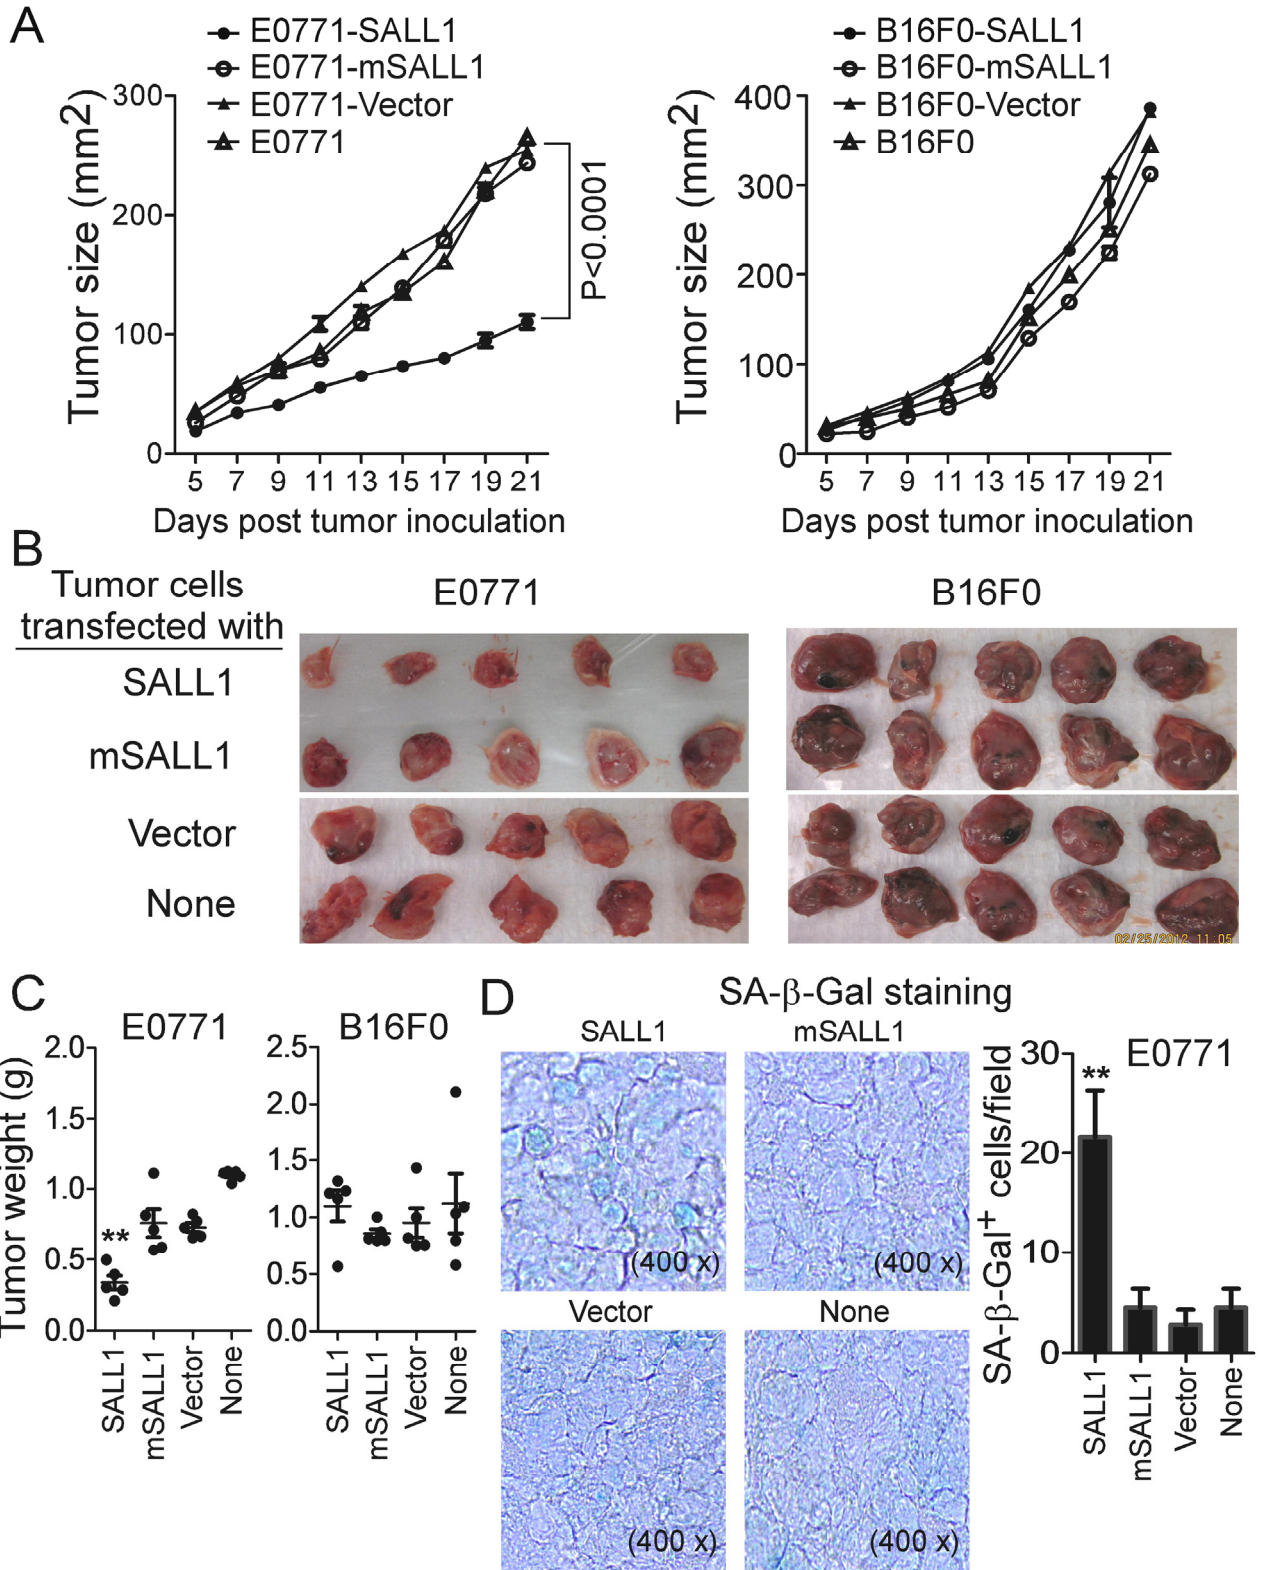

Figure 8. Ma et al.

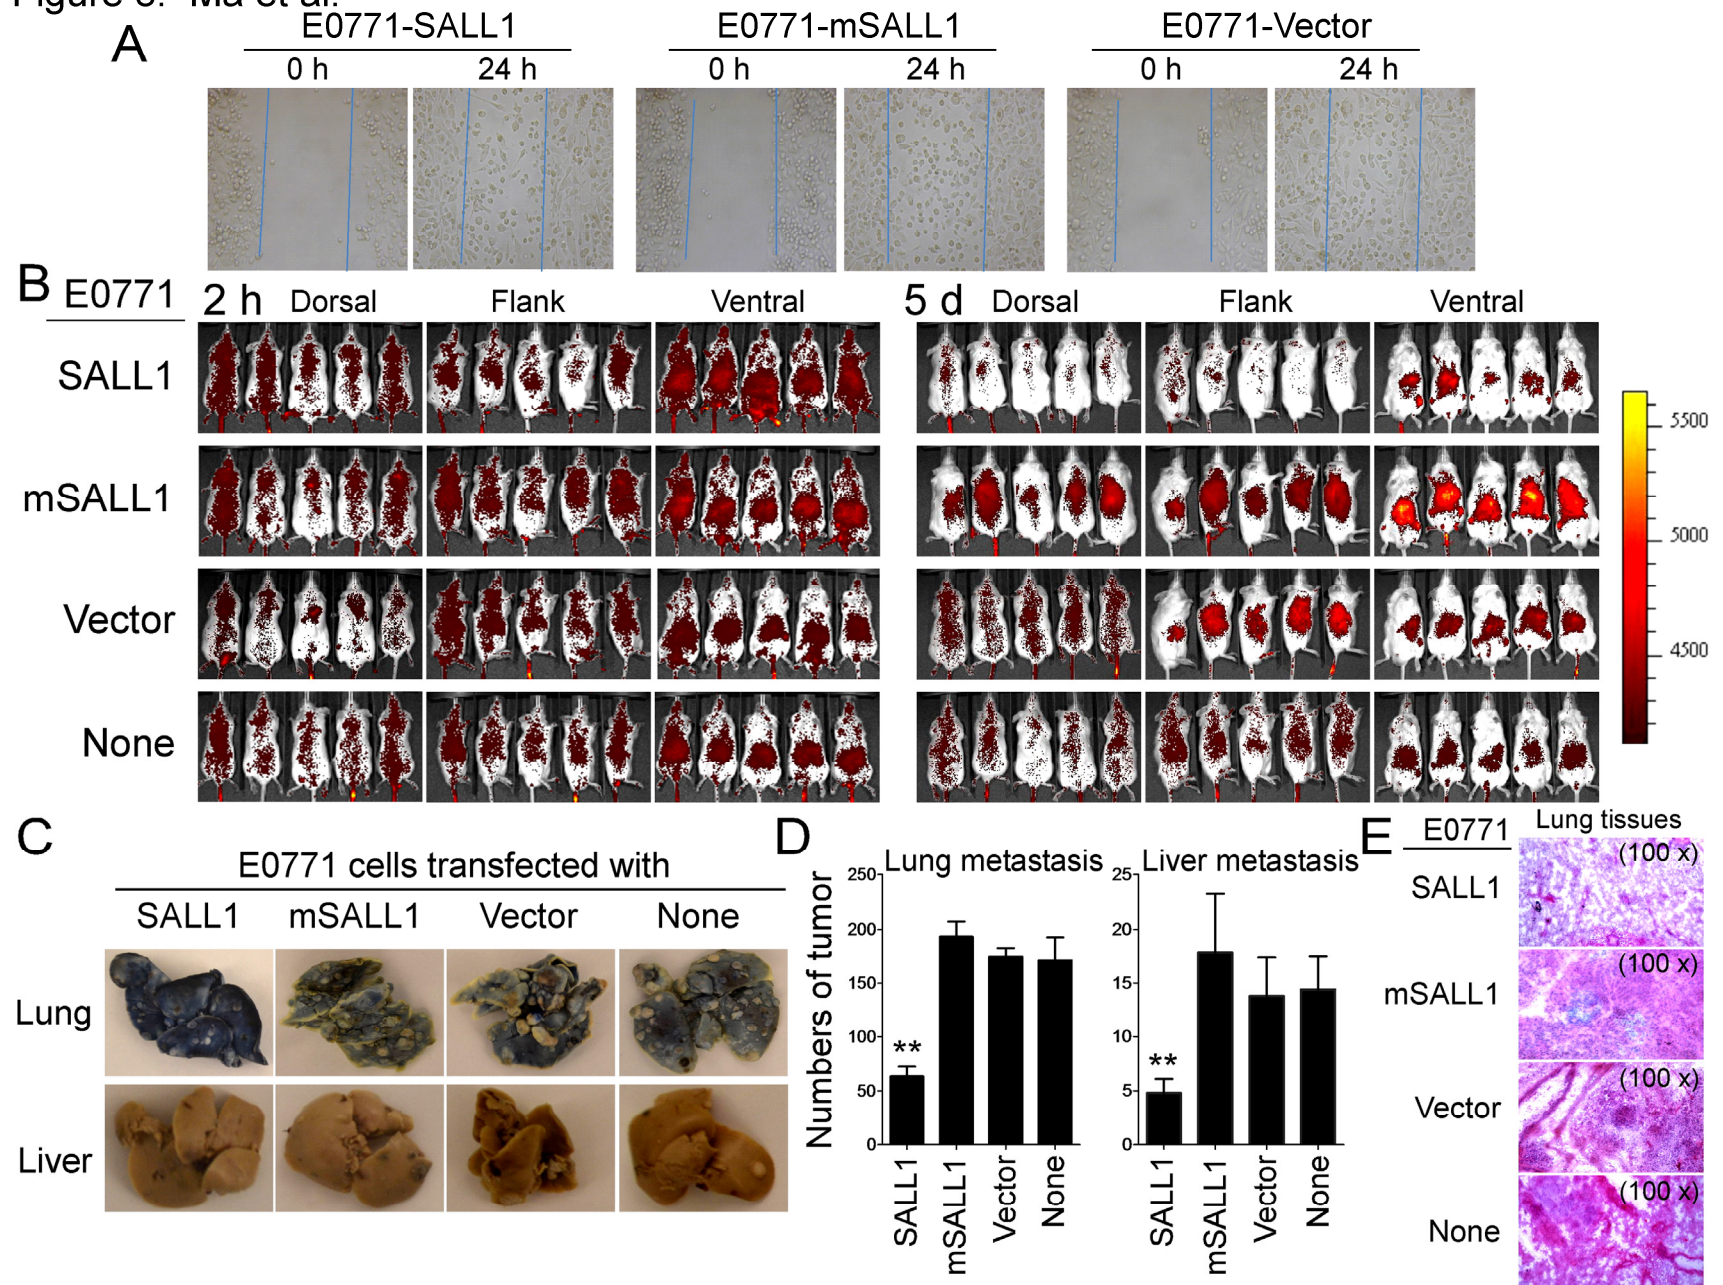



Figure S1. Ma et al.

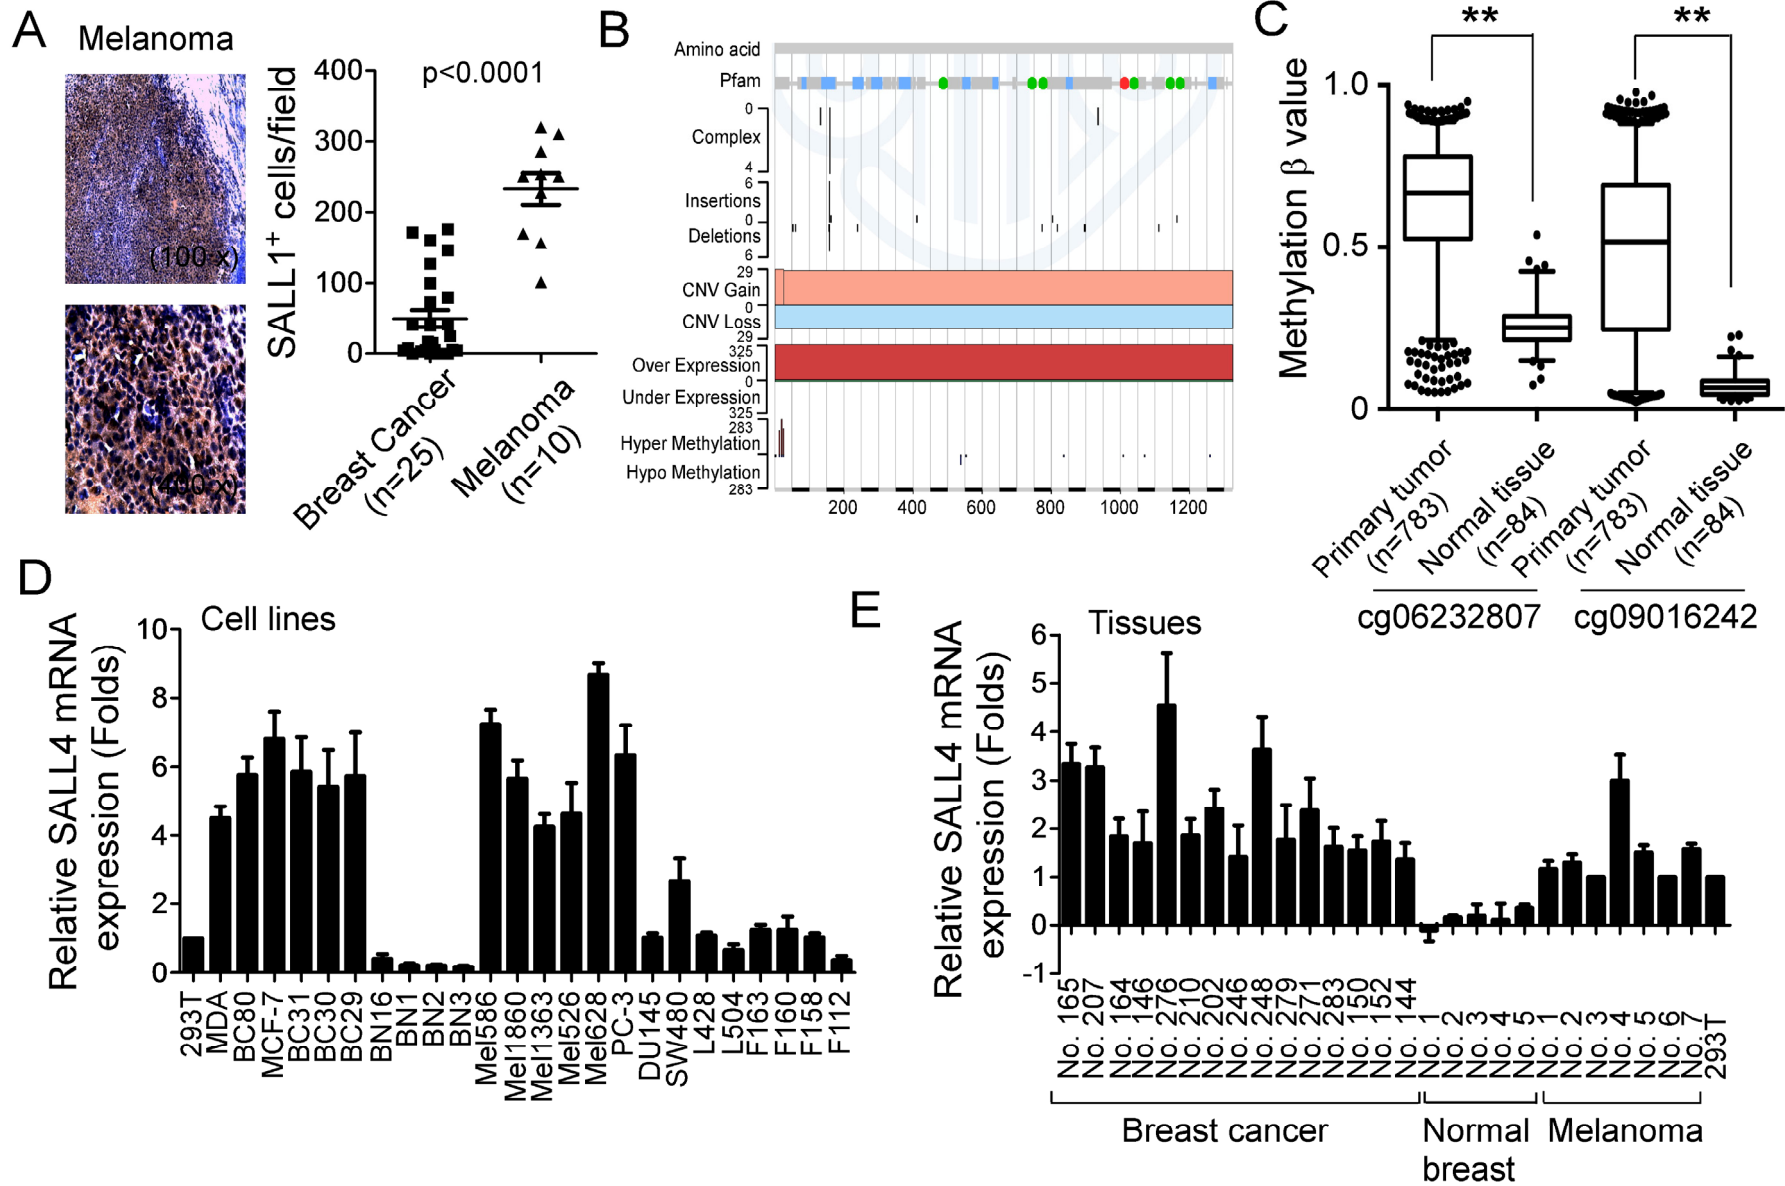

Figure S2. Ma et al.

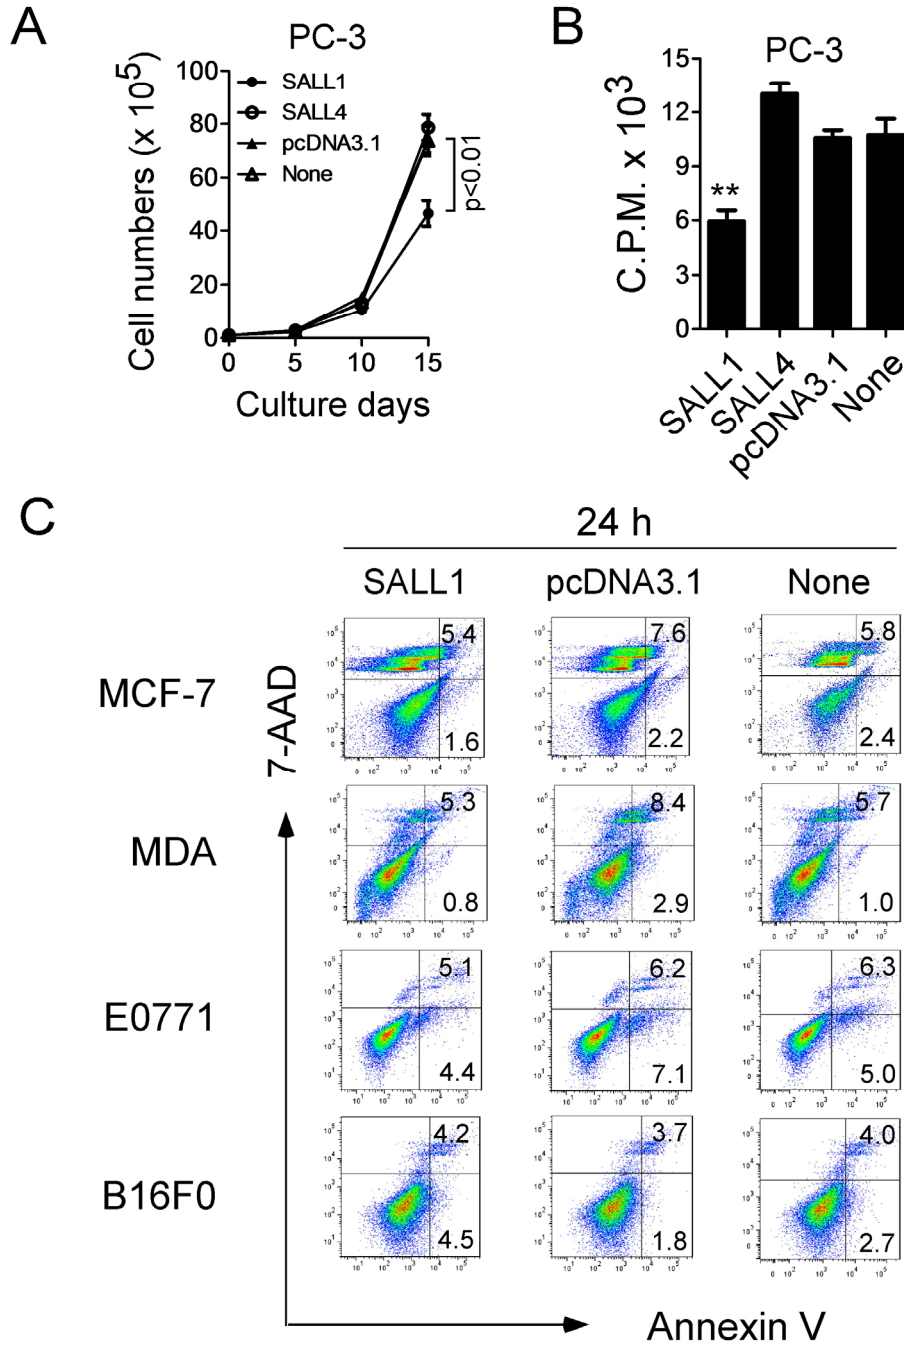

Figure S3. Ma et al.

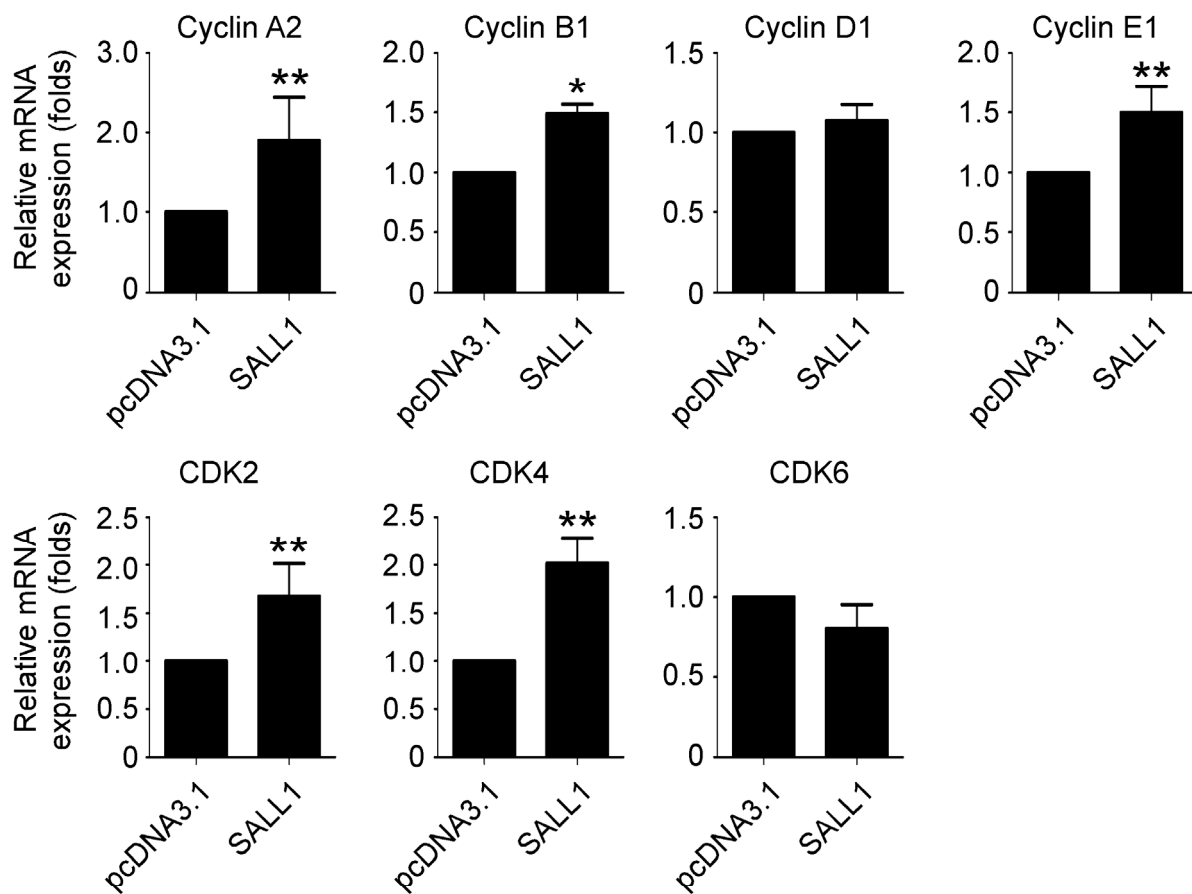

Figure S4. Ma et al.

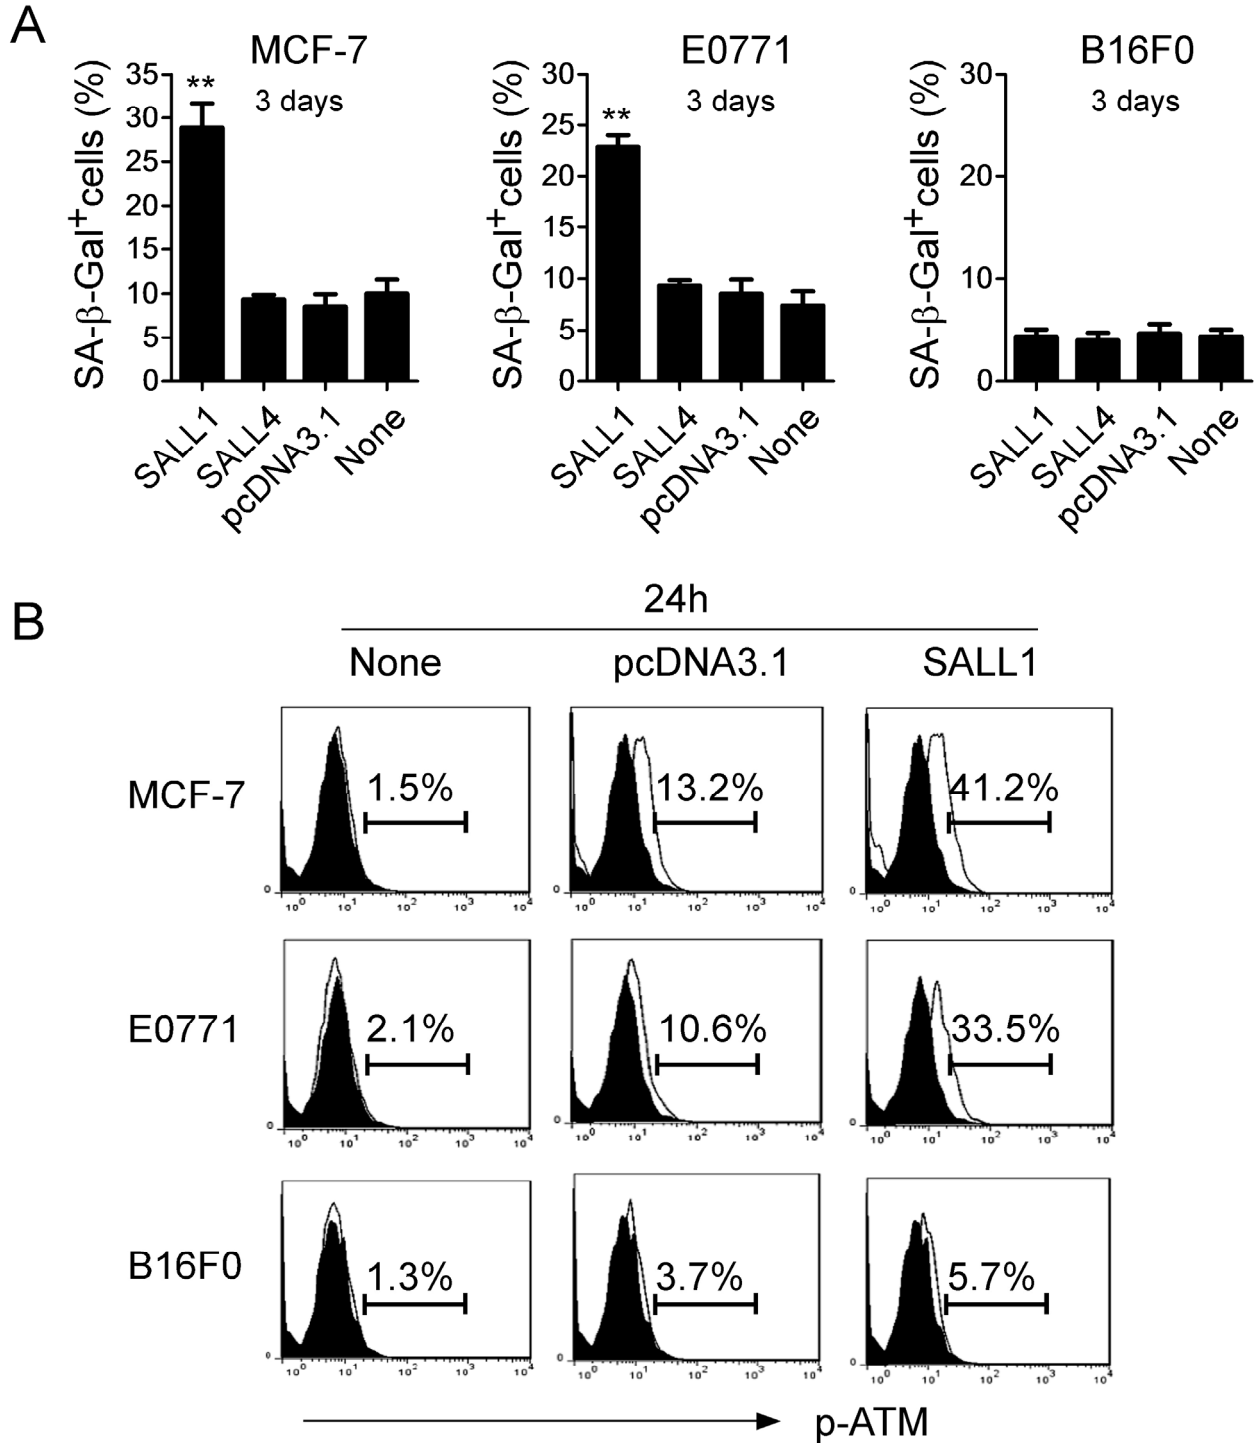

Figure S5. Ma et al.

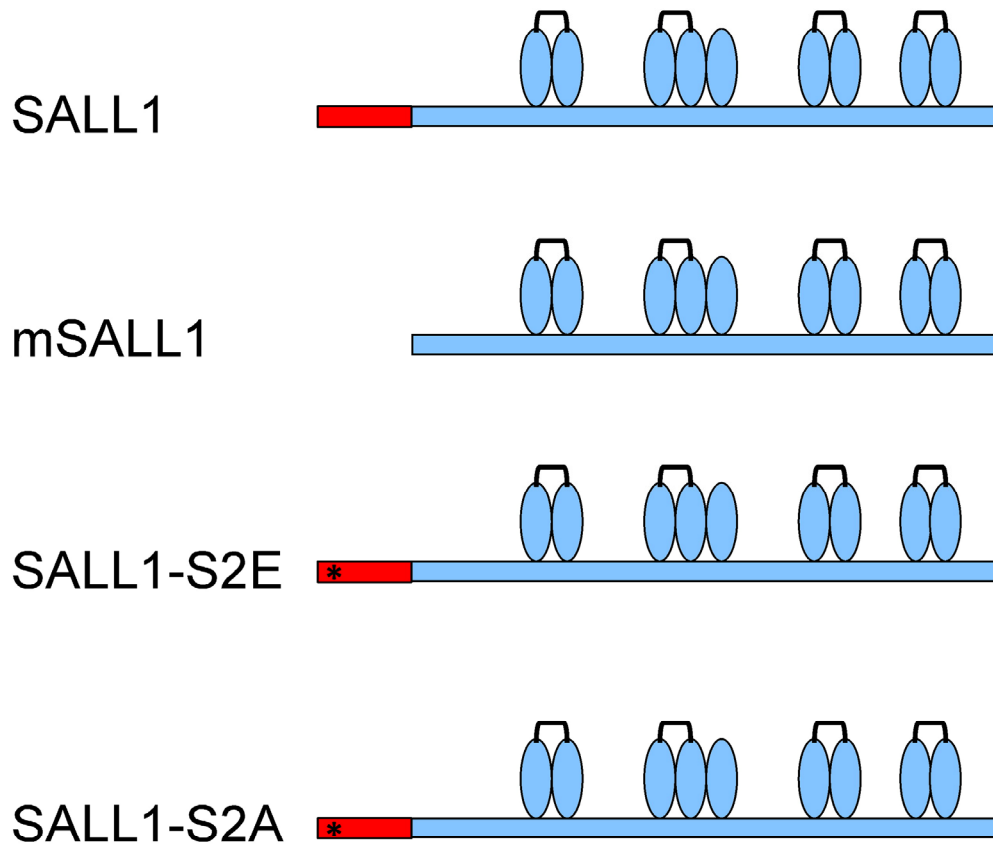

Figure S6. Ma et al.

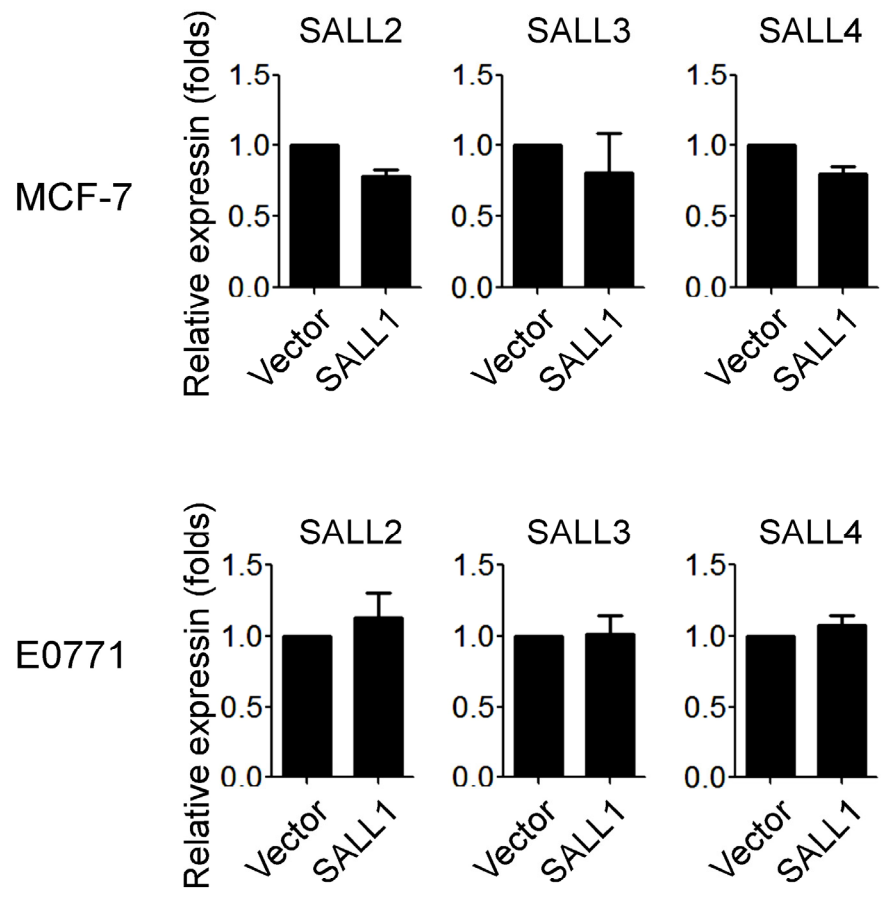

Figure S7. Ma et al.

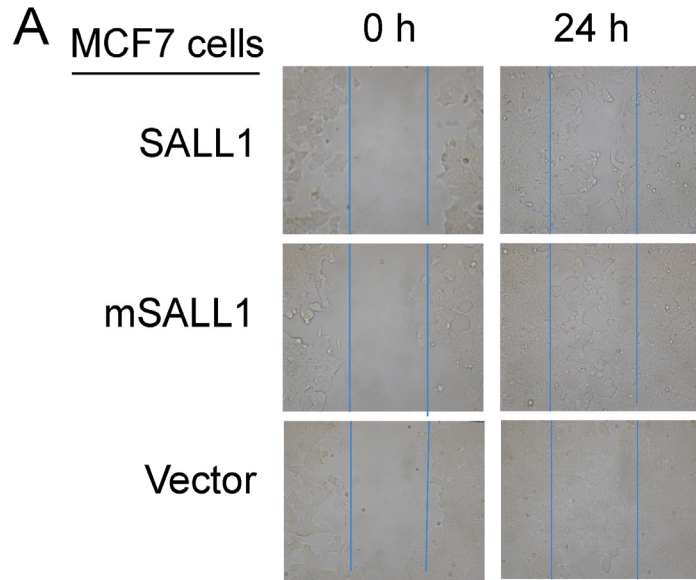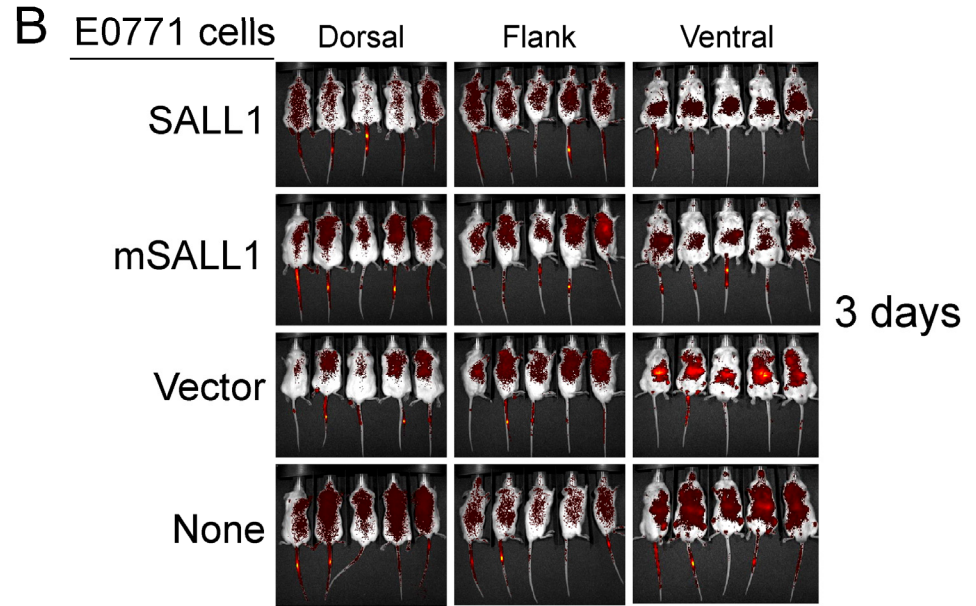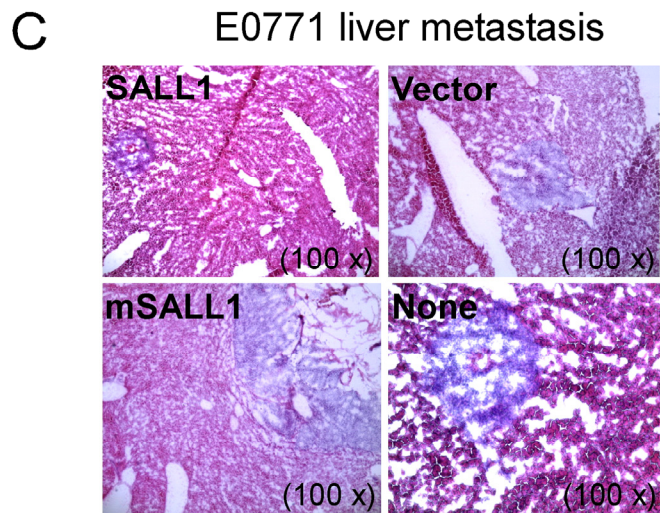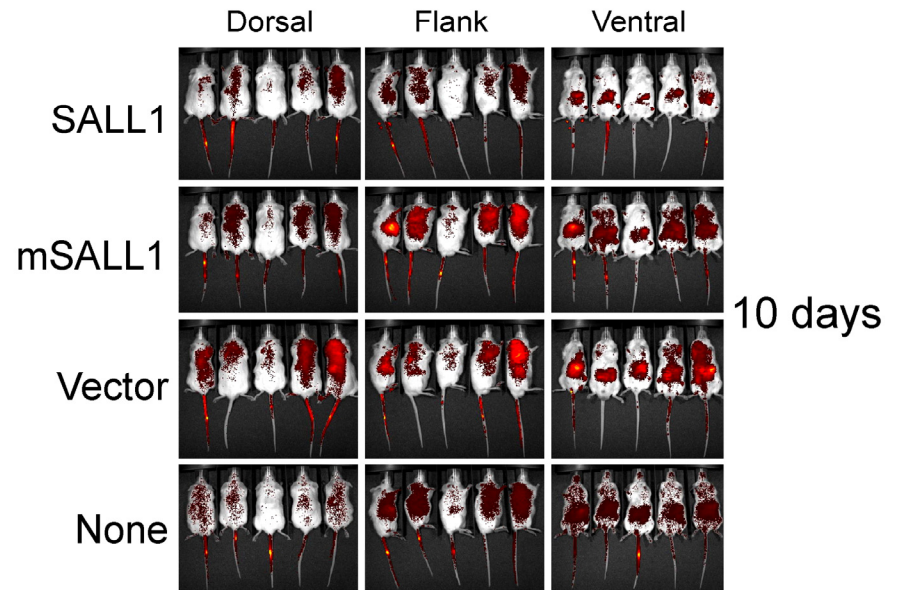

Supplement: MOESM1 [file 15597208]
